# Supplementary material
Source: HighWire-hosted journal article supplement (https://delf06.com/highwire/filestream/94044/field_highwire_adjunct_files/0/STROBEchecklist_BMJ_OPEN.pdf)
Supplement: STROBEchecklist_BMJ_OPEN.pdf [file STROBEchecklist_BMJ_OPEN.pdf]

STROBE Statement—Checklist of items that should be included in reports of *cohort studies*

|                           | <b>Item No</b> | <b>Recommendation</b>                                                        |
|---------------------------|----------------|------------------------------------------------------------------------------|
| <b>Title and abstract</b> | 1              | Page 1<br>Page 2                                                             |
| <b>Introduction</b>       |                |                                                                              |
| Background/rationale      | 2              | Page 4                                                                       |
| Objectives                | 3              | Page 4                                                                       |
| <b>Methods</b>            |                |                                                                              |
| Study design              | 4              | Page 5, 7 and 8                                                              |
| Setting                   | 5              | Page 5                                                                       |
| Participants              | 6              | Page 5                                                                       |
| Variables                 | 7              | Page 5, and 6                                                                |
| Data sources/ measurement | 8              | Page 5, 6 and 7                                                              |
| Bias                      | 9              | Page 7 and 8                                                                 |
| Study size                | 10             | Page 5                                                                       |
| Quantitative variables    | 11             | Page 5, 6 and 7                                                              |
| Statistical methods       | 12             | Page 7 and 8<br>Page 7 and 8<br>Page 7 and 8<br>Page 7 and 8<br>Page 7 and 8 |
| <b>Results</b>            |                |                                                                              |
| Participants              | 13             | Page 9<br>Page 9                                                             |
| Descriptive data          | 14             | Page 9<br>Page 9<br>Page 9                                                   |
| Outcome data              | 15             | Page 9, 10 and table 3, 4                                                    |
| Main results              | 16             | Table 3-4<br>Page 9 and 10<br>Table 3-4                                      |
| Other analyses            | 17             | No other analyses were done                                                  |
| <b>Discussion</b>         |                |                                                                              |
| Key results               | 18             | Page 11                                                                      |
| Limitations               | 19             | Page 12 and 13                                                               |
| Interpretation            | 20             | Page 11, 12 and 13                                                           |
| Generalisability          | 21             | Page 12 and 13                                                               |
| <b>Other information</b>  |                |                                                                              |
| Funding                   | 22             | Page 19                                                                      |
